# Supplementary material
Source: publisher figshare collection journal article supplement (https://diabetesjournals.figshare.com/ndownloader/files/25732262)
Supplement: Supplementary file 1 [file 25732262]

## **Supplementary Information**

**Defective FXR-SHP regulation in obesity aberrantly increases *miR-802* expression, promoting insulin resistance and fatty liver**

**Seok *et al.***

## Supplementary Figures

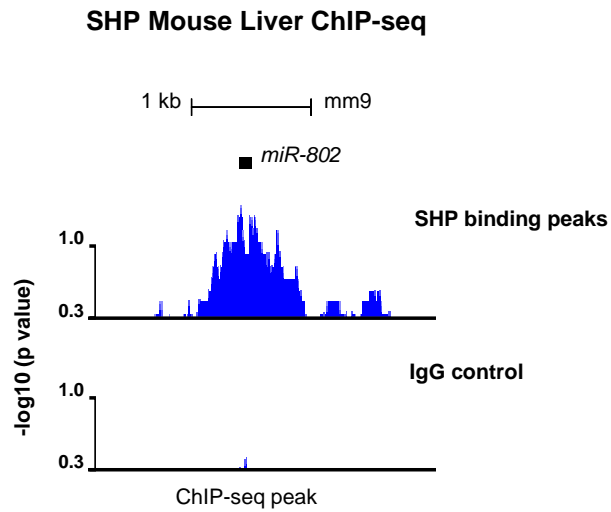

**Supplementary Figure 1. UCSD genome browser display of the SHP binding peaks at the *miR-802* gene generated from published SHP mouse liver ChIP-seq data (Kim et al., Liver ChIP-seq analysis in FGF19-treated mice reveals SHP as a global transcriptional partner of SREBP-2, Genome Biology, 2015. 16:268).**

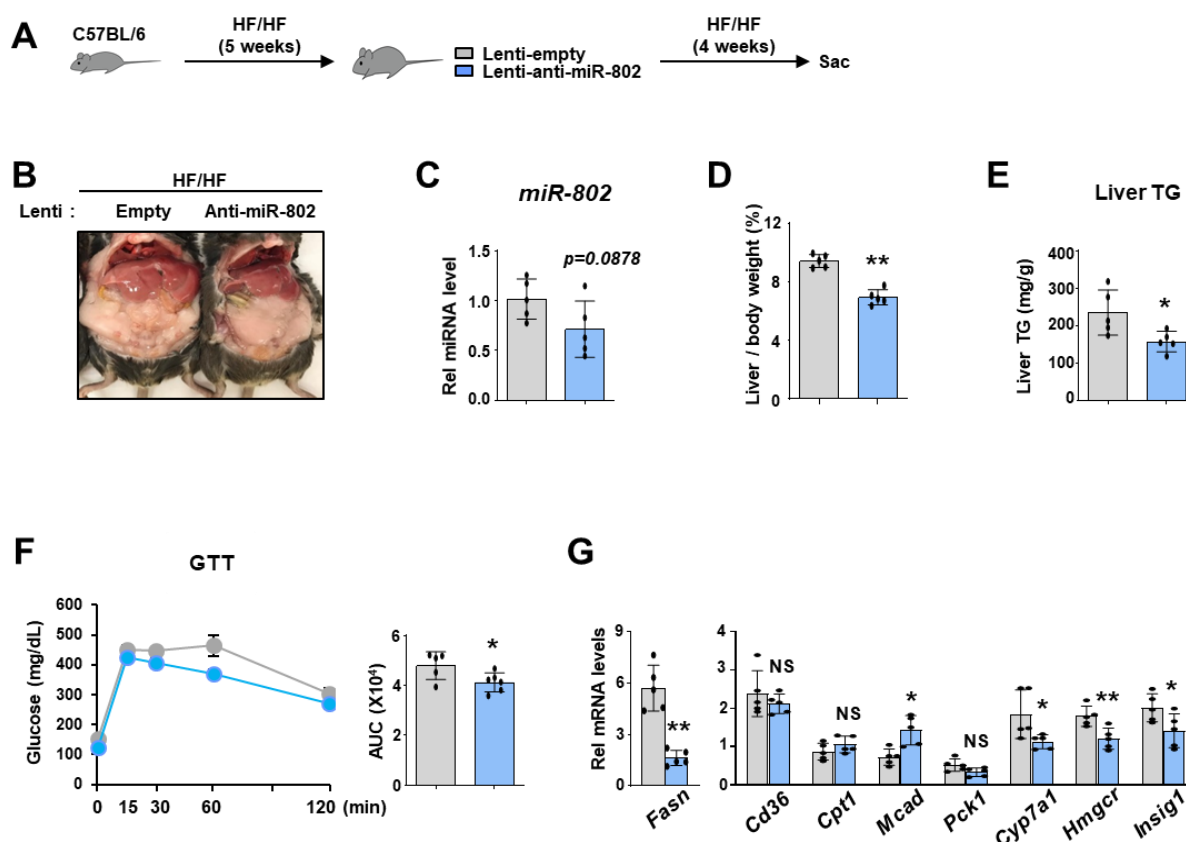

### Supplementary Figure 2. Downregulation of miR-802 in dietary obese mice:

**Downregulation of miR-802 in obese mice resulted in decreased liver TG levels and improved glucose tolerance and altered expression of genes involved in hepatic lipid, glucose, bile acid, and cholesterol metabolism.** (A) Experimental outline: C57BL/6 mice were fed high fat/high fructose (HF/HF) chow for 5 weeks and injected via the tail vein with lentivirus expressing miR-802 sponge for miR-802 downregulation for 4 weeks before sacrifice. (B) Representative pictures of obese mice infected with indicated viruses. (C) Hepatic miR-802 levels (n=5). (D) The ratio of liver/body weight, an indicator of fatty liver (n=5). (E) Liver TG levels (n=5). (F) Glucose tolerance test (GTT) and calculated area under the curve (AUC) (right) (n=6). (G) Levels of the mRNAs for genes involved in hepatic lipid, glucose, bile acid and cholesterol metabolism determined by RT-qPCR (n=5). Statistical significance was determined by the Student's t-test (n=5-6), \*  $p < 0.05$ , \*\*  $p < 0.01$ , NS, not significant.

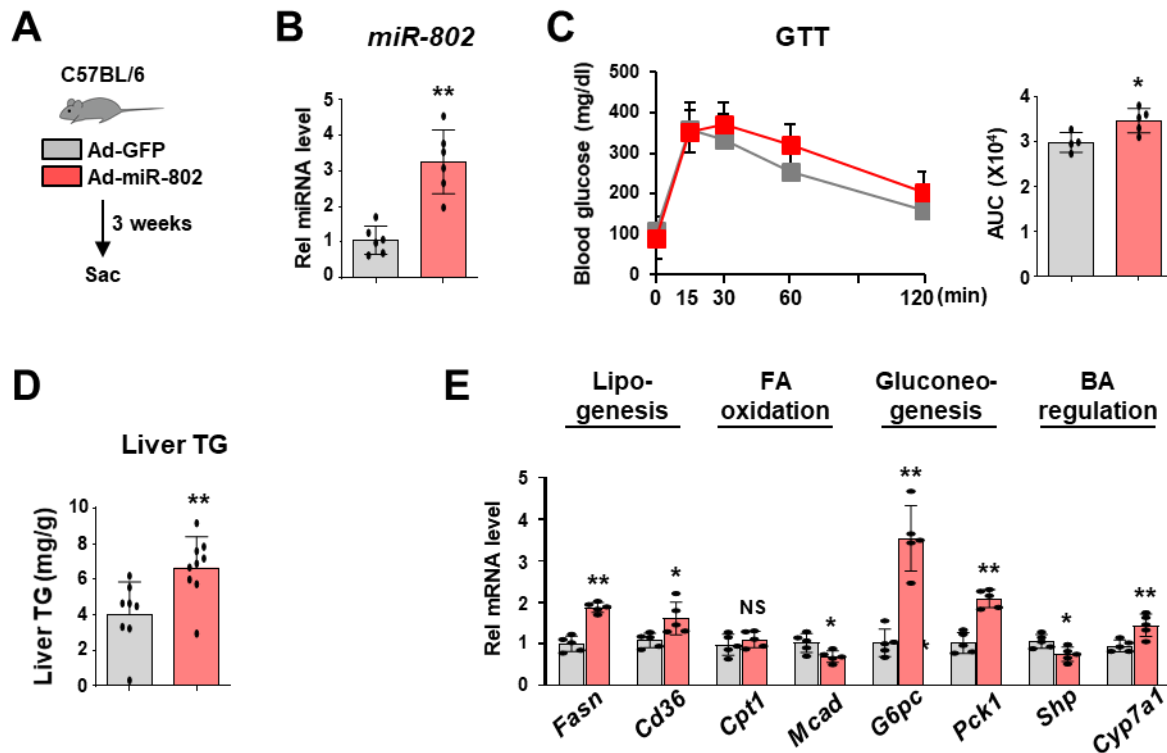

**Supplementary Figure 3. Overexpression of miR-802 in normal chow fed mice:**  
**Overexpression of miR-802 in lean mice resulted in increased glucose intolerance and liver TG levels and altered expression of genes involved in hepatic lipid, glucose, and bile acid metabolism.** (A) Experimental outline: C57BL/6 mice were fed normal chow and were injected via the tail vein with Ad virus expressing miR-802 for 3 weeks before sacrifice. (B) Hepatic miR-802 levels (n=6). (C) Glucose tolerance test (GTT) and calculated area under the curve (AUC) (right) (n=5). (D) Liver TG levels (n=9). (E) Levels of the mRNAs for genes involved in hepatic lipid, glucose, and bile acid metabolism determined by RT-qPCR (n=5). The mean and SD are plotted. Statistical significance was determined by the Student's t-test (n=5-9), \*  $p < 0.05$ , \*\*  $p < 0.01$ , NS, not significant.

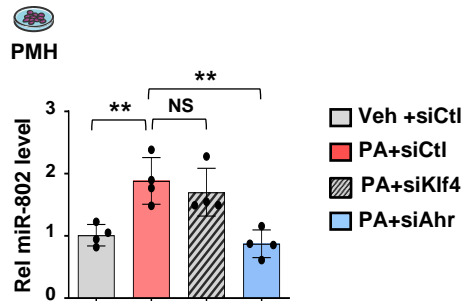

**Supplementary Figure 4. Downregulation of AHR, but not KLF4, decreased miR-802 levels in primary mouse hepatocytes (PMHs) treated with palmitic acid to mimic obesity.** PMHs were transfected with siRNA for KLF4 or AhR and 24 h later, treated with palmitic acid (PA) (300  $\mu$ M) for 24 h. Levels of miR-802 determined by RT-qPCR. The mean and standard deviation are plotted. Statistical significance was determined by the one-way ANOVA (n=4), \*\*  $p < 0.01$ , NS, not significant.

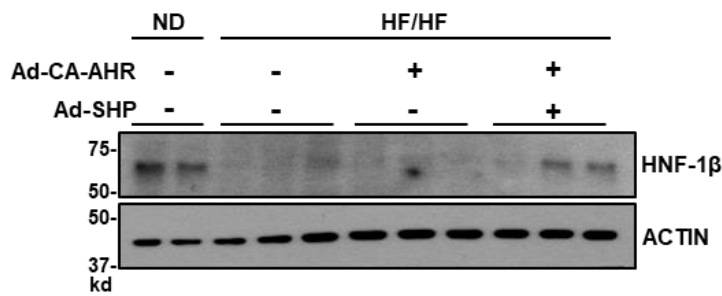

**Supplementary Figure 5. Hepatic protein levels of HNF-1 $\beta$  are decreased in dietary obese mice, and overexpression of SHP partially restores the levels.** Mice were fed a HF/HF diet for 8 weeks and then, injected via the tail vein with Ad viruses expressing AHR or SHP as indicated 3 weeks before sacrifice. Protein levels of HNF-1 $\beta$  and a loading control Actin in liver extracts determined by IB (n=2 for ND mice, n=3 for HF/HF mice).

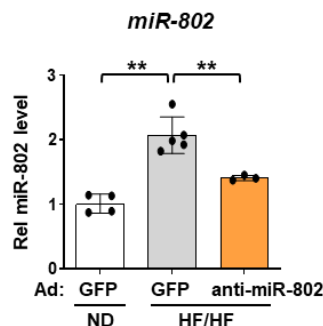

**Supplementary Figure 6. Adenoviral expression of antisense RNA for miR-802 in dietary obese mice resulted in significant reduction in hepatic miR-802 levels.** Mice were fed a HF/HF diet or normal chow diet (ND) for 7 weeks and infected with the indicated adenovirus 2 weeks before sacrifice. Hepatic miR-802 levels measured by RT-qPCR. The mean and standard deviation are plotted. Statistical significance was determined by one-way ANOVA (n=3-5), \*\*  $p < 0.01$ .

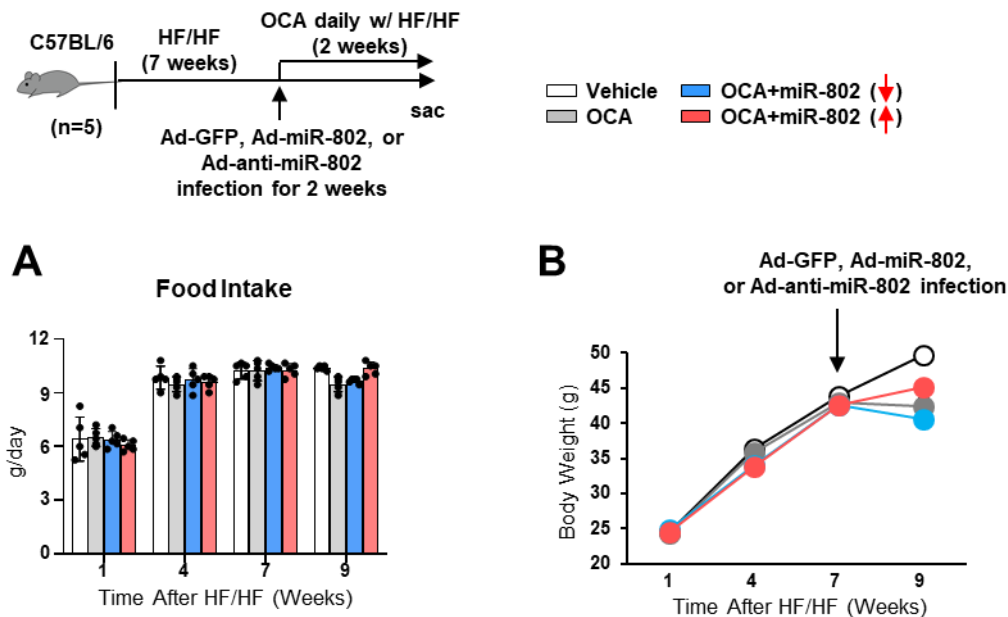

**Supplementary Figure 7. The effects of HF/HF, OCA treatment, and overexpression of miR-802 on body weight and food intake in mice.** Mice were fed a HF/HF diet for 7 weeks and then, injected via the tail vein Ad-miR-802, Ad-anti-miR-802, or control virus and treated daily with OCA for an additional 2 weeks as indicated in Fig. 5. (A) food intake. (B) body weight.

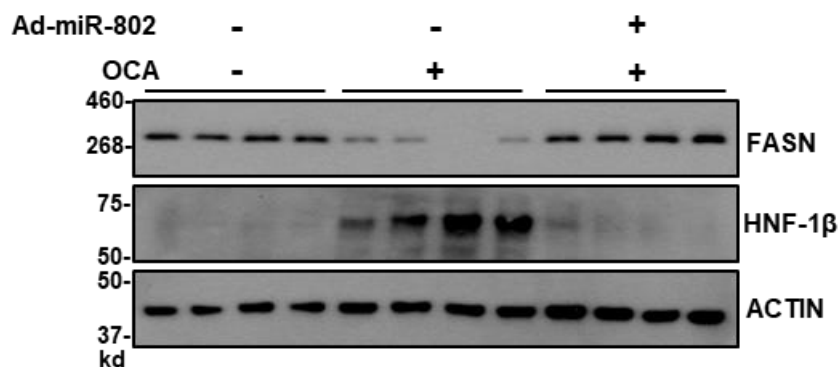

**Supplementary Figure 8. OCA-mediated effects on protein levels of FASN and HNF-1β are largely reversed by overexpression of miR-802.** Mice were fed a HF/HF diet for 7 weeks and then, injected via the tail vein with Ad-miR-802 or control virus and treated daily with OCA for 2 weeks before sacrifice as indicated in Fig. 5. Protein levels of FASN and HNF-1β in liver extracts determined by IB (n=4 mice)

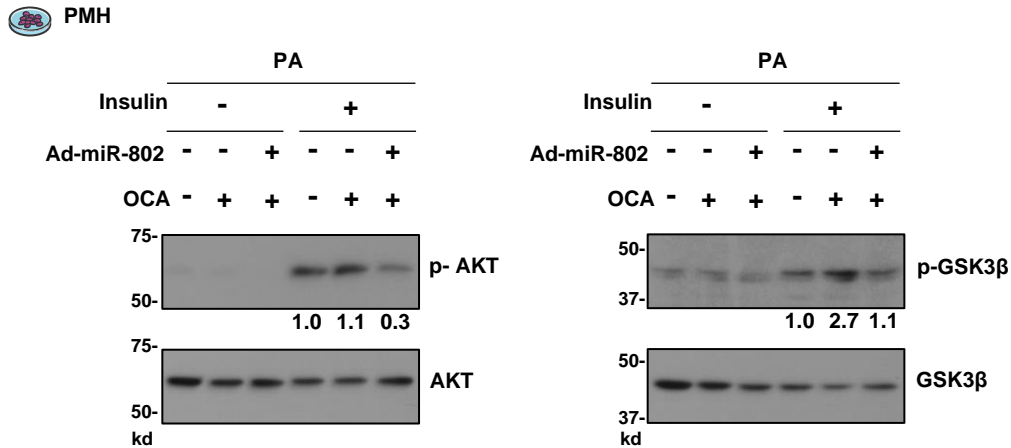

**Supplementary Figure 9. Overexpression of miR-802 decreased insulin signaling in OCA-treated hepatocytes.** PMHs were infected with Ad-miR802 and treated with OCA (10  $\mu$ M) and PA (300  $\mu$ M) for 1 day to mimic obesity, and then, treated with insulin (100 nM) for 10 min. Levels of the indicated proteins measured by IB.

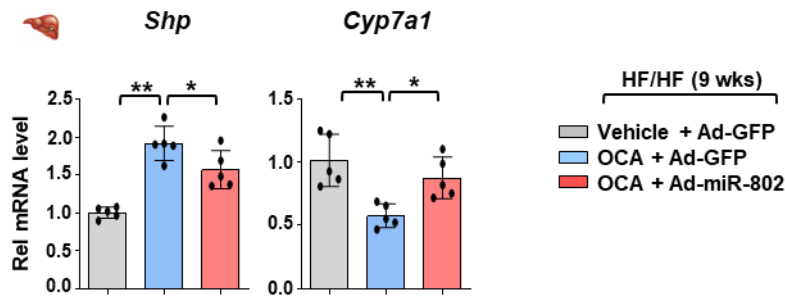

**Supplementary Figure 10. The effect of OCA treatment on expression of *Shp* and *Cyp7a1* in obese mice is blunted by overexpression of miR-802.** Mice were fed a HF/HF diet for 7 weeks and then, injected via the tail vein with Ad-miR-802 or control virus and treated daily with OCA for 2 weeks as indicated in Fig. 5 before sacrifice. Levels of the mRNAs for *Shp* and *Cyp7a1* determined by RT-qPCR. The mean and SD is plotted. Statistical significance was determined by one-way ANOVA (n=5 mice), \* p < 0.05, \*\* p < 0.01.

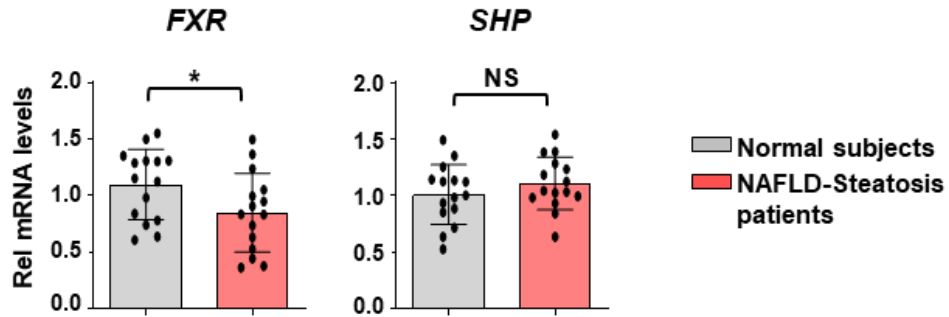

**Supplementary Figure 11. Hepatic mRNA levels of *FXR* are modestly reduced, whereas those of *SHP* are not changed, in NAFLD patients compared to normal individuals.** Liver samples from 15 normal individuals or 15 NAFLD-steatosis patients were analyzed. Hepatic levels of mRNAs for *FXR* and *SHP* determined by RT-qPCR. The mean and SD are plotted. Statistical significance was determined by the Student's t-test (n=15 individuals), \*  $p < 0.05$ , NS, not significant.

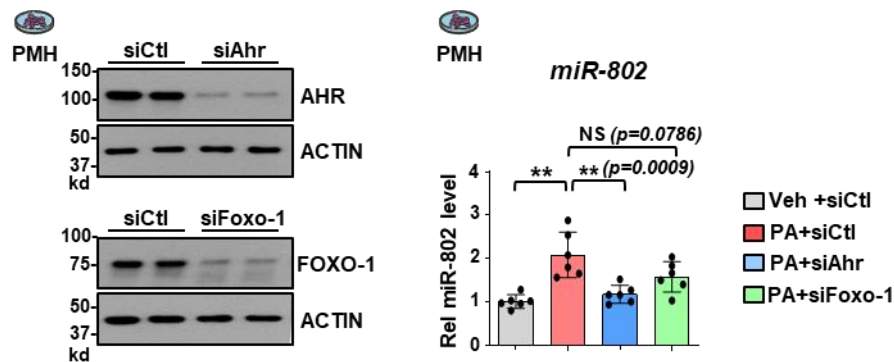

**Supplementary Figure 12. Downregulation of AHR, but not FOXO-1, significantly decreased miR-802 levels in PMHs treated with palmitic acid.** PMHs were transfected with siRNA for AhR or Foxo-1 and 24 h later, treated with palmitic acid (PA) (300  $\mu$ M) for 24 h. Protein levels of AHR and FOXO-1 determined by IB analysis (left). Levels of miR-802 determined by RT-qPCR (right). The mean and standard deviation are plotted. Statistical significance was determined by the one-way ANOVA (n=6), \*\*  $p < 0.01$ , NS, not significant.

## Supplementary Tables

**Supplementary Table 1: Primer sequences used for RT-qPCR**

### A. List of primer sequences for mouse RT-qPCR

| No. | Gene   | Forward (5'-3')            | Reverse (5'-3')            |
|-----|--------|----------------------------|----------------------------|
| 1   | Hnf-1b | AGGTCCGTGTCTACAACCTGG      | GTGACCTCATTGTTTCCCGG       |
| 2   | Hnf4   | AGCCACTGTCCCAATCAGTC       | TGCAACATAGCATCCTCAGC       |
| 3   | Foxo1  | AACCAGTCCAACTCGACCAC       | TGCTCATAAAGTCGGTGCTG       |
| 4   | Creb1  | AGTGCTGTTCTCCCGTCAAG       | TGTACCCACCTTCCTTCTGC       |
| 5   | Crtc2  | CCCTGCTATTGAGGAGAACG       | GCTGGTCAGGAGATGGAAAG       |
| 6   | Pck1   | CTTCTCTGCCAAGGTCATCC       | TTTTGGGGATGGGCAC           |
| 7   | G6pc   | GCTGAAACTTTTCAGCCACATCC    | TCCAAGCGGGAAACCAAAC        |
| 8   | Fasn   | CCTGGATAGCATTCGGAACCT      | AGCACATCTCGAAGGCTACACA     |
| 9   | Srebp1 | GCTGTTGGCATCCTGCTATC       | ATGCTGGAAGTGACGGTGGT       |
| 10  | CD36   | GCCAAGCTATTGCGACATGA       | AAGGCATTGGCTGGAAGAAC       |
| 11  | Cpt1   | TCGAAACATCTACCATGCAGCA     | CAGCATTCTTCGTGACGTTGG      |
| 12  | Mcad   | GATCGCAATGGGTGCTTTTGATAGAA | AGCTGATTGGCAATGTCTCCAGCAAA |
| 13  | 36B4   | CGACTCACAGAGCAGGC          | CACCGAGGCAACAGTTGG         |

### B. List of primer sequences for human RT-qPCR

| No. | Gene   | Forward (5'-3')      | Reverse (5'-3')      |
|-----|--------|----------------------|----------------------|
| 1   | HNF-1b | CAGGAAGGAGGAGGCATTC  | CAGCTTGTTTGGAGGAGAGG |
| 2   | PCK1   | ATCAAGTCAATGCCGACCTC | TATGGATGGGAAAGGGAATG |
| 3   | G6PC   | TGAGGATGGAGGAAGGAATG | TCACGGACACCAAGATGAAC |
| 4   | 36B4   | AAGGCTGTGGTGCTGATG   | GGTCCTCCTTGGTGAACA   |

**Supplementary Table 2: Primer sequences used for ChIP-qPCR**

### A. List of primer sequences for mouse ChIP-qPCR

| Gene                 | Forward (5'-3')         | Reverse (5'-3')             |
|----------------------|-------------------------|-----------------------------|
| miR-802              | TAGGGAAGGAATGTGGCAAG    | GGGCAGGCAGTATCCTCTTC        |
| miR-802(No SHP peak) | GACCTCCAGAATCCTCCTT     | AGAGTTGCTTTGGGCTGTG         |
| Cyp7a1               | ACCTTCGGCTTATCGACTATTGC | TATCTGGCCTTGAACCTAAGTCCATCT |

### B. List of primer sequences for human ChIP-qPCR

| Gene    | Forward (5'-3')      | Reverse (5'-3')     |
|---------|----------------------|---------------------|
| miR-802 | AGGAAGGTGGGAGAAGGAAG | GCAGCAAAGATCCGCAAAG |
